# Supplementary material for: Design principles of collateral sensitivity-based dosing strategies
Source: PubMed Central journal article supplement (PMC8479078; doi:10.1038/s41467-021-25927-3), 2021-09-28
Supplement: 41467_2021_25927_MOESM2_ESM.pdf [file 41467_2021_25927_MOESM2_ESM.pdf]

**Title:** Supplementary Software 1

**Description:** This .zip file contains all files needed to recreate the results in the study, as well as a minimal quick demonstration scenario. The model and simulation framework is built in the statistical software R. The model framework script (CS\_model\_function.R) is needed to run the model which can be done using the demo script (Scenario\_1\_DEMO.R) or any of the execution scrips (Scenario\_XX.R). The plot script (Plot\_script.R) is need to generate the figures using the respective figure scripts. A detailed overview and description can be found the included readme file.
